# Supplementary material for: Non-Invasive In Vivo Imaging of Near Infrared-labeled Transferrin in Breast Cancer Cells and Tumors Using Fluorescence Lifetime FRET
Source: PLOS journal article supplement (doi:10.1371/journal.pone.0080269), 2013-11-21
Supplement: S1 (10.1371/journal.pone.0080269.s001) [file journal.pone.0080269.s001]

## Supplementary Figures and Tables

**Abbreviations:** Tfn: transferrin, TfnR: transferrin receptor, A: acceptor, D: donor, AF: AlexaFluor, FRET: Förster Resonance Energy Transfer, E%: energy transfer %, EPR, , HMEC: human mammary epithelial cell, FD: FRET donor SD: standard deviation

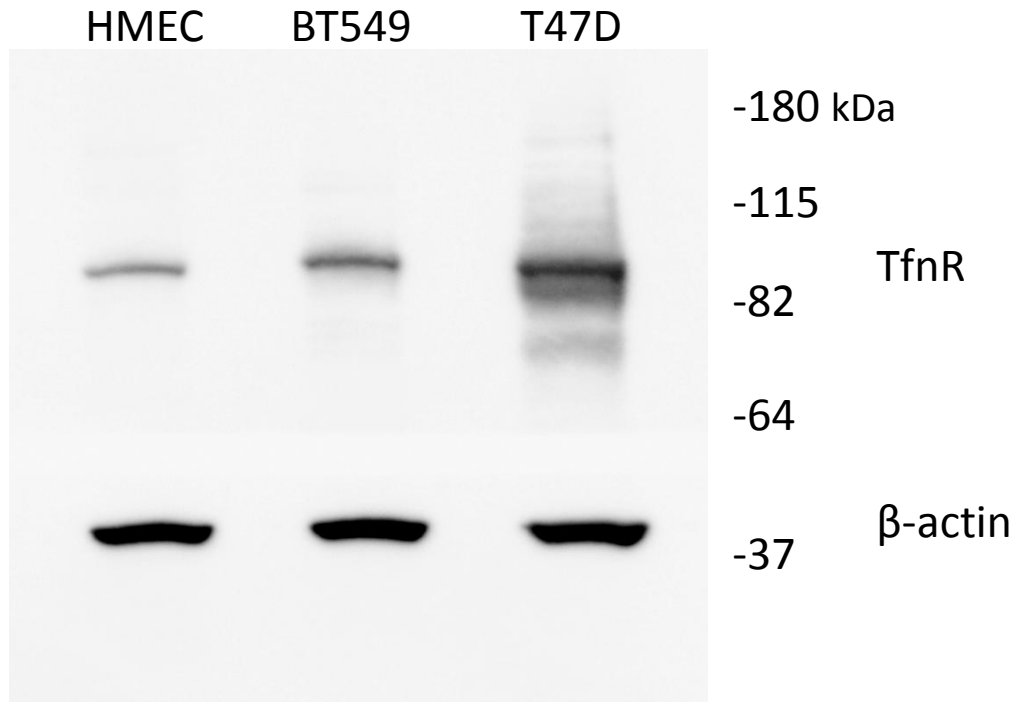

**Supplementary Figure S1.** Western Blot of TfnR in HMECs, BT-549, and T47D cells. Blots indicate higher expression of TfnR in human breast cancer cell lines BT549 and T47D compared to normal HMECs

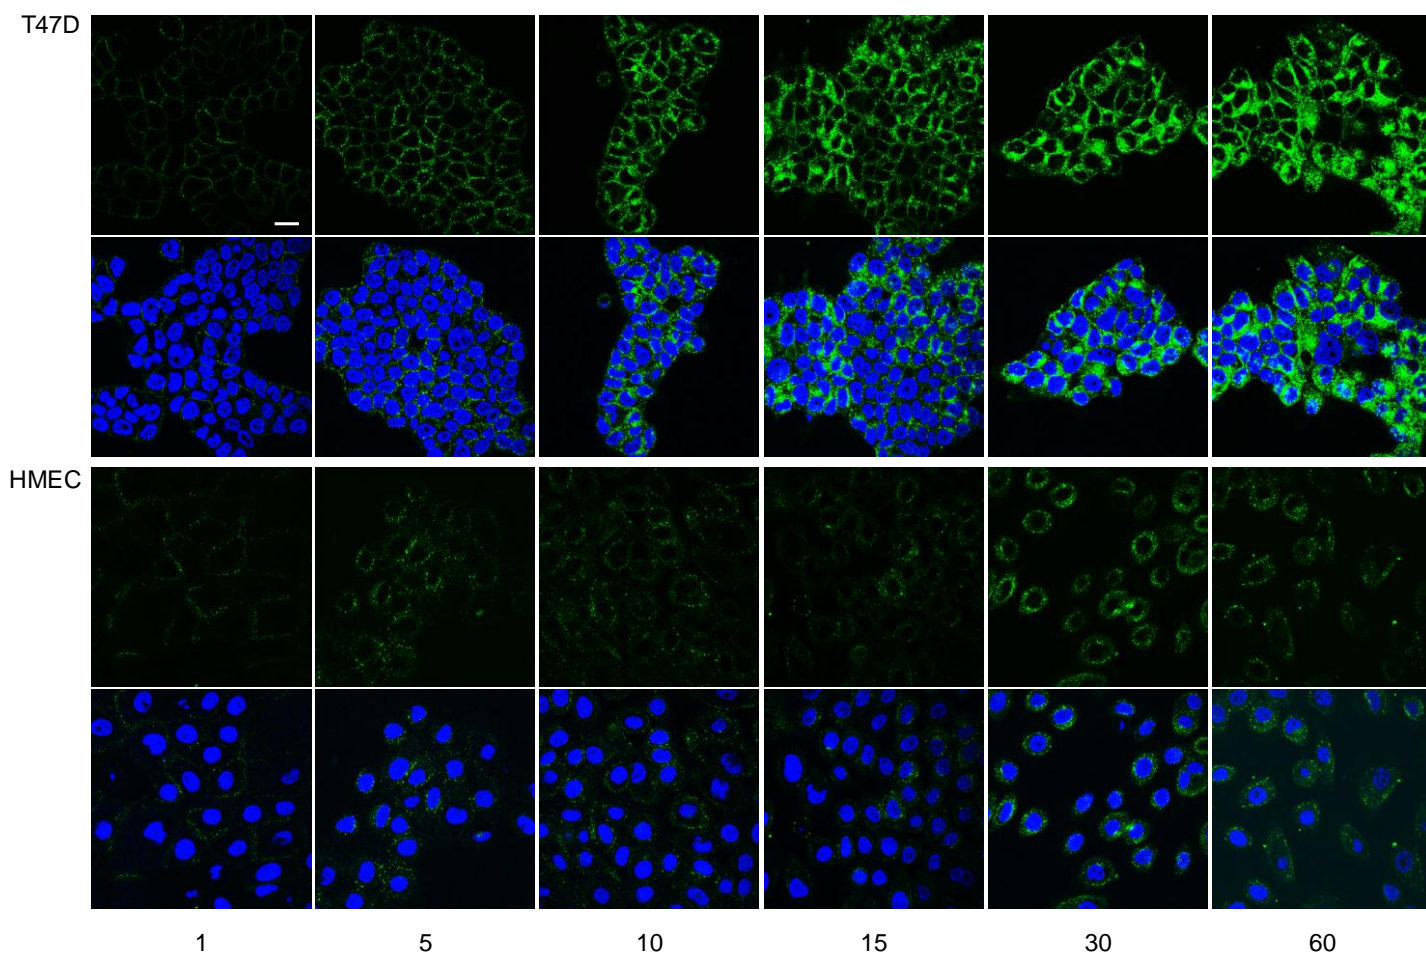

**Supplementary Figure S2.** HMEC and T47D cells are incubated with Tfn conjugated to AF488 (green) for the times as indicated (minutes) and imaged under confocal microscopy with DAPI staining (blue). Scale bar = 20  $\mu\text{m}$ . Tfn-AF488 internalization into HMEC and T47D cells is clearly detected between 1 and 10 min, showing plasma membrane localization at 1-5 min and intracellular peri-nuclear staining at 10-60 min.

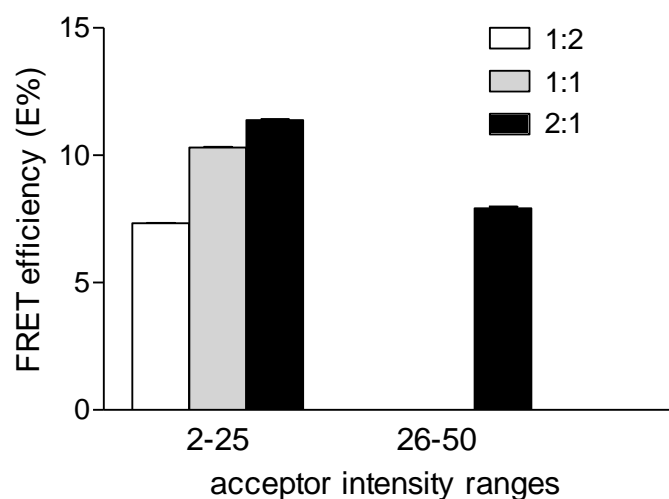

**Supplementary Figure S3.** HMEC cells internalized with A:D ratios of 1:2, 1:1, and 2:1 and plotted with binned acceptor intensity per pixel and E% values. Error bars indicate 95% confidence intervals. Absence of higher acceptor intensity ranges reflect decreased uptake of Tfn. A:D ratios of 1:2 and 1:1 in the 6-50 range is likely due to higher ratio of acceptor quenching donor. Similar increase in E% as A:D ratios increase (at acceptor range of 2-25) is observed compared to results found in Fig. 1B (main text).

**Supplementary Table S1 (for Figure 1B)**

| Cell Type        | T47D            | HMEC            |
|------------------|-----------------|-----------------|
| Slope            | 3.770 ± 0.3906  | 2.410 ± 1.226   |
| 95% CI for Slope | -1.193 to 8.732 | -13.17 to 17.99 |
| r <sup>2</sup>   | 0.9894          | 0.7943          |
| p-value          | 0.401 (n.s.)    |                 |
| analysis method  | ANCOVA          |                 |

Statistical analysis of slopes of FRET efficiency (E%) vs. A:D ratios between T47D and HMECs. No statistical significance is detected between T47D and HMEC slopes using Ancova analysis, suggesting that TfnR-Tfn complexes show similar FRET behavior in HMEC vs. T47D cells. n.s. = not statistically significant (p>0.05)

**Supplementary Table S2 (for Figure 1C)**

| Acceptor Range (pixel intensity) | 0-25          |        |        | 26-50         |        |        | 51-75    |       |        | 76-100  |       |        |
|----------------------------------|---------------|--------|--------|---------------|--------|--------|----------|-------|--------|---------|-------|--------|
| A:D ratios                       | 1:2           | 1:1    | 2:1    | 1:2           | 1:1    | 2:1    | 1:2      | 1:1   | 2:1    | 1:2     | 1:1   | 2:1    |
| Average (E%)                     | 8.183         | 11.682 | 16.613 | 6.725         | 10.230 | 14.400 | ND       | 9.434 | 13.476 | ND      | 9.871 | 12.857 |
| 95% CI                           | 0.140         | 0.149  | 0.391  | 0.376         | 0.138  | 0.168  | ND       | 0.376 | 0.275  | ND      | 1.807 | 0.559  |
| Count                            | 894           | 934    | 325    | 34            | 766    | 930    | ND       | 67    | 312    | ND      | 4     | 72     |
| p-value                          | <0.0001*      |        |        | <0.0001*      |        |        | <0.0001* |       |        | p<0.05* |       |        |
| Analysis Method                  | one-way ANOVA |        |        | one-way ANOVA |        |        | t-test   |       |        | t-test  |       |        |

Statistical analysis comparing Acceptor ranges among A:D ratios per binned acceptor range. Each acceptor Range column (0-25, 26-50, 51-75, 76-100) includes statistical analysis among the A:D ratios (1:2, 1:1, 2:1). One-way ANOVA is used for analysis in binned acceptor ranges of 0-25, 26-50. t-test analysis is performed for binned acceptor ranges of 51-75 and 76-100. The results show that at a fixed range of acceptor intensities, E% is positively dependent on A:D ratios, as expected for intra-molecular FRET between Tfn molecules bound to homodimeric TfnR; inter-molecular FRET between clustered TfnR-Tfn complexes cannot be excluded (8). p-values < 0.05 are considered significant (\*).

**Supplementary Table S3 (for Figure 2A)**

| A:D ratio | T47D<br>Short lifetime±SD (ps) | HMEC<br>Short lifetime±SD (ps) |
|-----------|--------------------------------|--------------------------------|
| 0:1       | 333±36                         | 321±36                         |
| 1:4       | 287±33                         | 328±45                         |
| 1:3       | 303±44                         | 314±33                         |
| 1:2       | 298±48                         | 301±4                          |
| 1:1       | 319±31                         | 285±24                         |
| 2:1       | 305±35                         | 320±33                         |
| 3:1       | 295±40                         | 304±13                         |

Short component lifetimes are estimated by biexponential fitting for both T47D and HMEC at A:D ratio from 0:1 to 3:1. The mean short lifetime for both T47 and HMEC is around 300ps. Small SDs are obtained (~32ps). These results indicate a high sensitivity and uniform detection despite the heterogeneity of donor intensities in the sample.

**Supplementary Table S4 (Figure 2B)**

| Cell Type                  | T47D           | HMEC           |
|----------------------------|----------------|----------------|
| Slope                      | 7.767 ± 0.5321 | 6.896 ± 0.5845 |
| 95% CI for Slope           | 6.290 to 9.244 | 5.274 to 8.519 |
| r <sup>2</sup>             | 0.9581         | 0.9530         |
| p-value (slope comparison) | 0.3029 (n.s.)  |                |
| analysis method            | ANCOVA         |                |

Statistical analysis of slopes of FD% vs. A:D ratios between T47D and HMECs. No statistical significance is detected between T47D and HMEC slopes using Ancova analysis, suggesting that TfnR-Tfn complexes show similar FRET behavior in HMEC vs. T47D cells, as shown in Supplementary Table 1. n.s. = not statistically significant (p>0.05).

**Supplementary Table S5 (Figure 2C)**

| Acceptor Ranges (μg/mL) | 2.5         |     |     | 5           |     |     | 10          |     |     | 20          |     |     |
|-------------------------|-------------|-----|-----|-------------|-----|-----|-------------|-----|-----|-------------|-----|-----|
| A:D ratios              | 1:2         | 2:1 | 3:1 | 1:2         | 2:1 | 3:1 | 1:2         | 2:1 | 3:1 | 1:2         | 2:1 | 3:1 |
| FD%                     | 14          | 25  | 40  | 14          | 24  | 32  | 14          | 25  | 31  | 14          | 25  | 31  |
| SD                      | 4           | 4   | 8   | 4           | 5   | 5   | 3           | 5   | 5   | 3           | 4   | 3   |
| p-value                 | <0.001*     |     |     | <0.01*      |     |     | <0.01*      |     |     | <0.001*     |     |     |
| Analysis Method         | 1-way ANOVA |     |     | 1-way ANOVA |     |     | 1-way ANOVA |     |     | 1-way ANOVA |     |     |

Statistical analysis comparing % FD among A:D ratios using acceptor ranges of 2.5, 5, 10, and 20 μg/ml Tfn. p-value is the comparison of the % FD among all A:D ranges (1:2, 2:1, 3:1). The results show that at a fixed range of acceptor concentrations, FD% is positively dependent on A:D ratios, as expected for intra-molecular FRET between Tfn molecules bound to homodimeric TfnR; inter-molecular FRET between clustered TfnR-Tfn complexes cannot be excluded (8). p-values < 0.05 are considered significant (\*).

**Supplementary Table S6 (Figure 2D)**

| Cell Number                | T47D (1x10 <sup>5</sup> cells) | T47D (1x10 <sup>4</sup> cells) |
|----------------------------|--------------------------------|--------------------------------|
| Slope                      | 9.631 ± 0.7624                 | 7.767 ± 0.5321                 |
| 95% CI for Slope           | 7.514 to 11.75                 | 6.290 to 9.244                 |
| r <sup>2</sup>             | 0.9755                         | 0.9816                         |
| p-value (slope comparison) | 0.08 (n.s.)                    |                                |
| analysis method            | ANCOVA                         |                                |

Statistical analysis of slopes of FD% vs. A:D ratios in T47D cells at 1x10<sup>5</sup> and 1x10<sup>4</sup> cells. No statistical significance is detected using Ancova analysis, suggesting sensitivity of % FD is consistent across 1 x10<sup>5</sup> to 1 x10<sup>4</sup> T47D cells. n.s. = not statistically significant (p>0.05).

**Supplementary Table S7 (for Figure 3A)**

| <b>A:D ratios</b> | <b>20 µg/mL<br/>Short lifetime±SD (ps)</b> | <b>40 µg/mL<br/>Short lifetime±SD (ps)</b> |
|-------------------|--------------------------------------------|--------------------------------------------|
| 0:1               | 333±35                                     | 322±42                                     |
| 2:1               | 320±38                                     | 336±18                                     |

Short component lifetimes measured in picoseconds are shown, indicating a high sensitivity and uniform detection despite the heterogeneity of donor intensities in the sample.

**Supplementary Table S8 (for Figure 3B)**

| <b>Amount of Tfn</b>   | <b>20 µg/mL</b>  |     | <b>40 µg/mL</b>  |     |
|------------------------|------------------|-----|------------------|-----|
| <b>A:D ratios</b>      | 0:1 (donor only) | 2:1 | 0:1 (donor only) | 2:1 |
| <b>FD%</b>             | 11               | 39  | 13               | 37  |
| <b>SD</b>              | 4                | 3   | 4                | 3   |
| <b>p-value</b>         | <0.001*          |     | <0.005*          |     |
| <b>Analysis Method</b> | t-test           |     | t-test           |     |

Statistical analysis comparing % FD between 0:1 and 2:1 A:D ratios for each amount of Tfn (20 µg/ml and 40 µg/ml). Statistical significance is reached comparing 0:1 vs. 2:1 A:D ratios for all Tfn amounts. The results show that at a fixed range of acceptor concentrations, FD% is positively dependent on A:D ratios, as shown in supplementary table 5. p-values < 0.05 are considered significant (\*).

**Supplementary Table 9 (for Figure 3B)**

| <b>A:D ratios</b>      | <b>0:1 (donor only)</b> |          | <b>2:1</b>    |          |
|------------------------|-------------------------|----------|---------------|----------|
| <b>Amount of Tfn</b>   | 20 µg/mL                | 40 µg/mL | 20 µg/mL      | 40 µg/mL |
| <b>FD%</b>             | 11                      | 13       | 39            | 37       |
| <b>SD</b>              | 4                       | 3        | 3             | 3        |
| <b>p-value</b>         | 0.5734 (n.s.)           |          | 0.4601 (n.s.) |          |
| <b>Analysis Method</b> | t-test                  |          | t-test        |          |

Statistical analysis comparing % FD between 20 µg/ml and 40 µg/ml at either 0:1 or 2:1 A:D ratios. No statistical significance between each comparison is detected, suggesting sensitivity of % FD is consistent across internalization of 20 µg/mL and 40 µg/mL of Tfn. n.s. = not statistically significant (p>0.05).

**Supplementary Table S10 (for Figure 3B)**

| <b>Source of Variation</b> | <b>Interaction</b> | <b>A:D Ratio</b> | <b>Tfn amount</b> |
|----------------------------|--------------------|------------------|-------------------|
| % Total Variation          | 0.56               | 94.77            | 0.00              |
| p-value                    | 0.3559 (n.s.)      | < 0.0001*        | 1.0000 (n.s.)     |
| Analysis Method            | two-way ANOVA      |                  |                   |

Two-way ANOVA table to determine which parameter, A:D ratio or Tfn amount accounts for the variation in results. As shown, Acceptor:Donor ratios demonstrate the strongest influence in variation of data. n.s. = not statistically significant (p>0.05); p-values < 0.05 are considered significant (\*).

**Supplementary Table S11 (for Figure 4A)**

| <b>A:D ratios</b> | <b>Short lifetime±SD (ps)</b> |
|-------------------|-------------------------------|
|-------------------|-------------------------------|

|     |        |
|-----|--------|
| 0:1 | 318±34 |
| 1:2 | 317±50 |
| 1:1 | 306±44 |
| 2:1 | 322±39 |

Short component lifetimes are estimated by biexponential fitting for live mice at A:D ratio from 0:1 to 2:1. The mean short lifetime is around 300ps. Small standard deviations are obtained (~40ps). These *in vivo* results are consistent with the *in vitro* data and demonstrate that our imaging platform is sensitive and quantitatively matches *in vitro* results generated by confocal microscopy.

**Supplementary Table S12 (for Figure 4B)**

|                 |            |     |
|-----------------|------------|-----|
| A:D ratios      | 1:2        | 2:1 |
| FD%             | 24         | 36  |
| SD              | 4          | 3   |
| p-value         | p< 0.0001* |     |
| Analysis Method | t-test     |     |

FD% values are listed for A:D ratios of 1:2 and 2:1. Analysis indicates statistical significance between low and high values supporting a linear increase in FD% as A:D ratios increase. p-values < 0.05 are considered significant (\*).
